# Supplementary material for: Alleles of the GRF3-2A Gene in Wheat and Their Agronomic Value
Source: MDPI journal article supplement (doi:10.3390/ijms222212376), 2021-11-16
Supplement: s1 [file s1]

|             |                                        |       |                    |                      |               |           |          |         |           |          |          |        |       |         |         |       |       |     |     |
|-------------|----------------------------------------|-------|--------------------|----------------------|---------------|-----------|----------|---------|-----------|----------|----------|--------|-------|---------|---------|-------|-------|-----|-----|
|             |                                        | *     | 20                 | *                    | 40            | *         | 60       | *       | 80        | *        | 100      |        |       |         |         |       |       |     |     |
| GRF3-2A_A : | MAMPFASLSPAADHHRSSPIFFPCRSSPLYSAGEEAAQ | QQQQ  | QQHAMSGARWAAARPAT  | FTAAQYEELEQQALIYKYL  | VAGVPVPPDLLLP | I         | RRGFDSL  | :       | 99        |          |          |        |       |         |         |       |       |     |     |
| GRF3-2A_B : | MAMPFASLSPAADHHRSSPIFFPCRSSPLYSAGEEAAQ | QQQQ  | QQHAMSGARWAAARPAT  | FTAAQYEELEQQALIYKYL  | VAGVPVPPDLLLP | I         | RRGFDSL  | :       | 99        |          |          |        |       |         |         |       |       |     |     |
| GRF3-2A_C : | MAMPFASLSPAADHHRSSPIFFPCRSSPLYSAGEEAAQ | QQQQ  | QQHAMSGARWAAARPAT  | FTAAQYEELEQQALIYKYL  | VAGVPVPPDLLLP | I         | RRGFDSL  | :       | 99        |          |          |        |       |         |         |       |       |     |     |
| GRF3-2A_D : | MAMPFASLSPAADHHRSSPIFFPCRSSPLYSAGEEAAQ | --    | QQHAMSGARWAAARPAT  | FTAAQYEELEQQALIYKYL  | VAGVPVPPDLLLP | I         | RRGFDSL  | :       | 96        |          |          |        |       |         |         |       |       |     |     |
| GRF3-2B :   | MAMPFASLSPAADHHRSSPIFFPCRSSPLYSVGEETA  | HQQQ  | QQHTMSGARWAA--RPAT | FTAAQYEELEQQALIYKYL  | VAGVPVPPDLLLP | I         | RRGFDSL  | :       | 97        |          |          |        |       |         |         |       |       |     |     |
| GRF3-2D :   | MAMPFASLSPAADHHRSSPIFFPCRSSPLYSAGEEAAQ | QQ--  | QQHAMSGARWAAMRPAT  | FTAAQYQEELEQQALIYKYL | VAGVPVPPDLLLP | I         | RRD      | FDSL    | :         | 97       |          |        |       |         |         |       |       |     |     |
|             | 0                                      | *     | 120                | *                    | 140           | *         | 160      | *       | 180       | *        | 200      |        |       |         |         |       |       |     |     |
| GRF3-2A_A : | ASRFYHHHALGYGSYFGKKLD                  | PEPGR | CRRTDGKKWRC        | SKEAAQ               | DSKYCERH      | MHRGRN    | RSRK     | PVET    | QLV-----  | SHSQ     | LQQQ     | AP---  | AAAF  | HGH     | SPYP    | :     | 189   |     |     |
| GRF3-2A_B : | ASRFYHHHALGYGSYFGKKLD                  | PEPGR | CRRTDGKKWRC        | SKEAAQ               | DSKYCERH      | MHRGRN    | RSRK     | PVET    | HLV-----  | SHSQ     | LQQQ     | AP---  | AAAF  | HGH     | SPYP    | :     | 189   |     |     |
| GRF3-2A_C : | ASRFYHHHALGYGSYFGKKLD                  | PEPGR | CRRTDGKKWRC        | SKEAAQ               | DSKYCERH      | MHRGRN    | RSRK     | PVET    | QLV-----  | SHSQ     | LQQH     | GP---  | AAAF  | HGH     | SPYP    | :     | 189   |     |     |
| GRF3-2A_D : | ASRFYHHHALGYGSYFGKKLD                  | PEPGR | CRRTDGKKWRC        | SKEAAQ               | DSKYCERH      | MHRGRN    | RSRK     | PVET    | QLV-----  | SHSQ     | LQQQ     | AP---  | AAAF  | HGH     | SPYP    | :     | 186   |     |     |
| GRF3-2B :   | ASRFYHHHALGYGSYFGKKLD                  | PEPGR | CRRTDGKKWRC        | SKEAAQ               | DSKYCERH      | MHRGRN    | RSRK     | PVET    | QLVATPH-H | SHSQ     | LQQH     | APAAS  | AAAF  | HSH     | SPYP    | :     | 195   |     |     |
| GRF3-2D :   | ASRFYHHHALGYGSYFGKKLD                  | PEPGR | CRRTDGKKWRC        | SKEAAQ               | DSKYCERH      | MHRGRN    | RSRK     | PVET    | QLVATPHSH | SHSQ     | LQQH     | APAAT  | AAAF  | HSH     | SPYP    | :     | 196   |     |     |
|             | 00                                     | *     | 220                | *                    | 240           | *         | 260      | *       | 280       | *        | 300      |        |       |         |         |       |       |     |     |
| GRF3-2A_A : | AIATGAG--                              | APGS  | FALGSTAQL          | HMDNAAAP             | YATAGAAGN     | KDFRYSAYG | FRTSAMED | HNQFISA | AMDTAM    | DNYSWRLL | PAQNSS   | FSLS   | SSYP  | PMLSTLS | DL      | :     | 286   |     |     |
| GRF3-2A_B : | AIATGAG--                              | APGS  | FALGSTAQL          | HMDNAAAP             | YATAGAAGN     | KDFRYSAYG | FRTSAMED | HNQFISA | AMDTAM    | DNYSWRLL | PAQNSS   | FSLS   | SSYP  | PMLSTLS | DL      | :     | 286   |     |     |
| GRF3-2A_C : | AIATGAG--                              | APGS  | FALGSTAQL          | HMDNAAAP             | YATAGAAGN     | KDFRYSAYG | FRTSAMED | HNQFISA | AMDTAM    | DNYSWRLL | PAQNSS   | FSLS   | SSYP  | PMLSTLS | DL      | :     | 286   |     |     |
| GRF3-2A_D : | AIATGAG--                              | APGS  | FALGSTAQL          | HMDNAAAP             | YATAGAAGN     | KDFRYSAYG | FRTSAMED | HNQFISA | AMDTAM    | DNYSWRLL | PAQNSS   | FSLS   | SSYP  | PMLSTLS | DL      | :     | 283   |     |     |
| GRF3-2B :   | AIASGGG---                             | GSF   | AVGS-AQL           | HMDNAAAP             | YATAGAAGN     | KDFRYSAYG | FRTSAMED | HNQFISA | AMETAM    | ENYSCRL  | MPAQNSS  | FSLS   | ASYP  | PMLGTL  | GL      | :     | 289   |     |     |
| GRF3-2D :   | AIATGGGGG                              | AAGS  | FGLGS-AQL          | HMDNAAAP             | YATAGAAGN     | KDFRYSAYG | FRTSALE  | HNQFISA | AMDTAM    | DNYSWR   | LMPAQNSS | AFSL   | SSYP  | PMLGTL  | GL      | :     | 294   |     |     |
|             | 300                                    | *     | 320                | *                    | 340           | *         | 360      | *       | 380       | *        | 400      |        |       |         |         |       |       |     |     |
| GRF3-2A_A : | QSAICSLAKTEREPLS                       | FFGV  | GGGFDDDE           | SAVKQENQ             | TLRPFF        | DEWPKDR   | DSWP     | ELQD    | HDSNHN    | NEAF     | SATKLS   | SISIP  | VTSS  | DFSTTAG | SRSPH   | GIYSR | :     | 384 |     |
| GRF3-2A_B : | QSAICSLAKTEREPLS                       | FFGV  | GGGFDDDE           | SAVKQENQ             | TLRPFF        | DEWPKDR   | DSWP     | ELQD    | HDSNHN    | NEAF     | SATKLS   | SISIP  | VTSS  | DFSTTAG | SRSPH   | GIYSR | :     | 384 |     |
| GRF3-2A_C : | QSAICSLAKTEREPLS                       | FFGV  | GGGFDDDE           | SAVKQENQ             | TLRPFF        | DEWPKDR   | DSWP     | ELQD    | HDSNHN    | NEAF     | SATKLS   | SISIP  | VTSS  | DFSTTAG | SRSPH   | GIYSR | :     | 384 |     |
| GRF3-2A_D : | QSAICSLAKTEREPLS                       | FFGV  | GGGFDDDE           | SAVKQENQ             | TLRPFF        | DEWPKDR   | DSWP     | ELQD    | HDSNHN    | NEAF     | SATKLS   | SISIP  | VTSS  | DFSTTAG | SRSPH   | GIYSR | :     | 381 |     |
| GRF3-2B :   | QSAICSLAKTEREPLS                       | FFGG  | GGGFDDDD           | SAVKQENQ             | TLRPFF        | DEWPKDR   | DSWP     | ELQD    | HDSN      | SSNA     | AF       | SATKLS | SISIP | VTSS    | DFSTTAG | SRSPN | GIYSR | :   | 387 |
| GRF3-2D :   | QSAICSLAKTEREPLS                       | FFGG  | GGGFEDDE           | SAVKQENQ             | TLRPFF        | DEWPKDR   | DSWP     | ELQD    | HDSN      | HSNA     | AF       | SATKLS | SISIP | VTSS    | DFSTTAG | SRSPH | GIYSR | :   | 391 |

**Figure S1.** Alignment of the GRF3-2A protein isoforms with GRF3-2B and GRF3-2D proteins. The WRC domain that functions in DNA binding is highlighted in green (PEPGRCRRTDGKKWRC SKEAAQDSKYCERH MHRGRNRSRK P), while the QLQ domain involved in protein-protein interactions is highlighted in yellow (FTAAQYEELEQQAL IYKYL VAGVPVPPD LLLPI).
