# Supplementary material for: Alleles of the GRF3-2A Gene in Wheat and Their Agronomic Value
Source: MDPI journal article supplement (doi:10.3390/ijms222212376), 2021-11-16
Supplement: s1 [file s1]

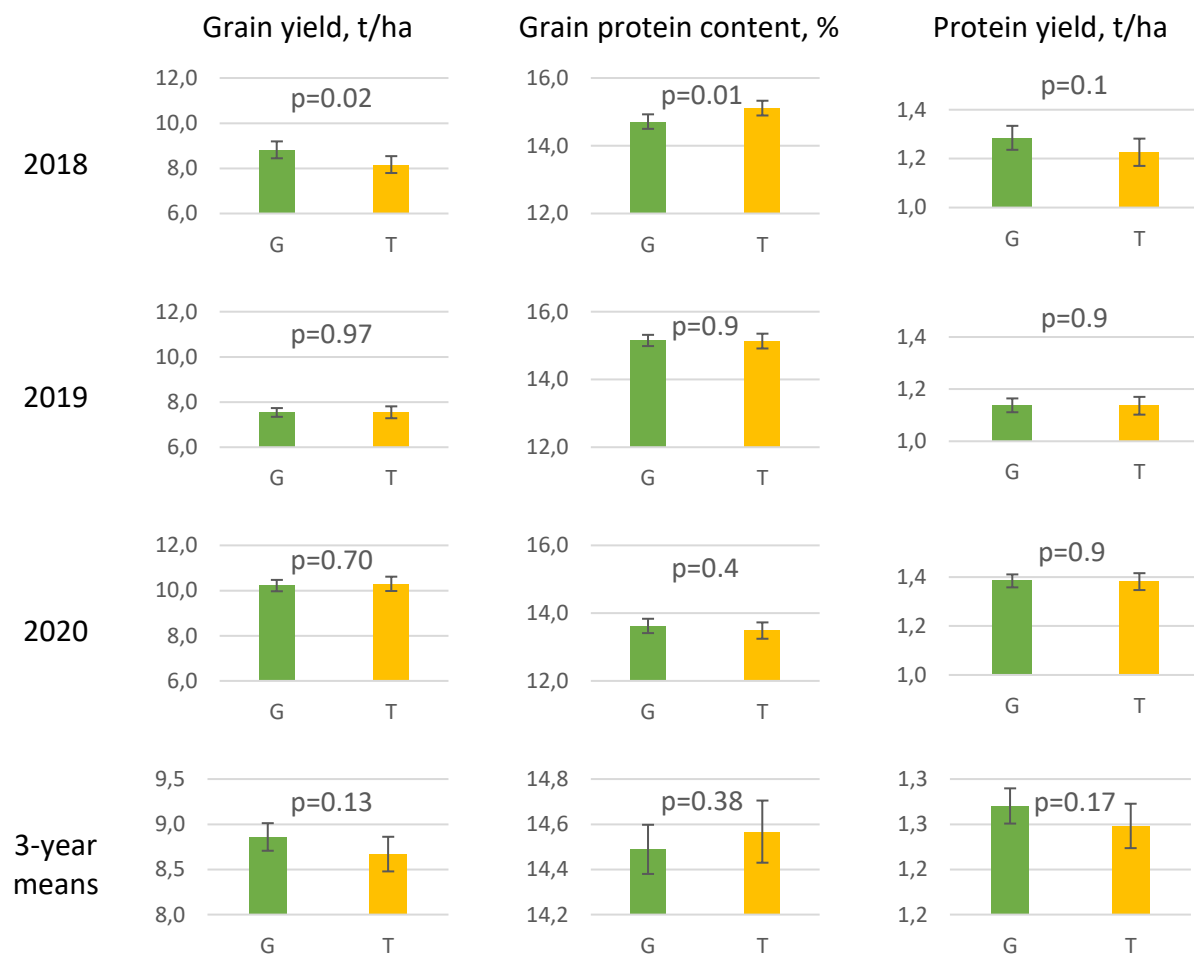

**Figure S2.** Grain yield, protein content and protein yield for wheat accessions differing in missense mutation c.495G>T in the *TaGRF3-2A* gene tested during 2018-2020 at Krasnodar. Bars indicate 95% confidence intervals. The p-values are calculated for Fisher's F-test. The percentages were transformed using  $\arcsin(\sqrt{x/100})$  before ANOVA. The reverse-transformed means and boundaries of confidence intervals are shown.
