# Supplementary material for: Alleles of the GRF3-2A Gene in Wheat and Their Agronomic Value
Source: MDPI journal article supplement (doi:10.3390/ijms222212376), 2021-11-16
Supplement: s1 [file s1]

**Table S6.** Wheat accessions, for which a complete genome sequence is available, and which were used for *GRF3-2A* allele discovery

| Accession name          | Species                                                        | Growth habit | Status            | Country of origin | Reference (DOI)           |
|-------------------------|----------------------------------------------------------------|--------------|-------------------|-------------------|---------------------------|
| ArinaLrFor              | <i>T. aestivum</i> L. subsp. <i>aestivum</i>                   | winter       | breeding material | Switzerland       | 10.1038/s41586-020-2961-x |
| Cadenza                 | <i>T. aestivum</i> L. subsp. <i>aestivum</i>                   | spring       | cultivar          | UK England        | 10.1038/s41586-020-2961-x |
| CDC Landmark            | <i>T. aestivum</i> L. subsp. <i>aestivum</i>                   | spring       | cultivar          | Canada            | 10.1038/s41586-020-2961-x |
| CDC Stanley             | <i>T. aestivum</i> L. subsp. <i>aestivum</i>                   | spring       | cultivar          | Canada            | 10.1038/s41586-020-2961-x |
| Chinese Spring          | <i>T. aestivum</i> L. subsp. <i>aestivum</i>                   | spring       | landrace          | China             | 10.1126/science.aar7191   |
| Claire                  | <i>T. aestivum</i> L. subsp. <i>aestivum</i>                   | winter       | cultivar          | UK England        | 10.1038/s41586-020-2961-x |
| Jagger                  | <i>T. aestivum</i> L. subsp. <i>aestivum</i>                   | winter       | cultivar          | USA               | 10.1038/s41586-020-2961-x |
| Julius                  | <i>T. aestivum</i> L. subsp. <i>aestivum</i>                   | winter       | cultivar          | Germany           | 10.1038/s41586-020-2961-x |
| Kronos                  | <i>T. turgidum</i> L. subsp. <i>durum</i> (Desf.) van Slageren | spring       | cultivar          | USA               | 10.3389/fpls.2019.01244   |
| Lancer                  | <i>T. aestivum</i> L. subsp. <i>aestivum</i>                   | spring       | cultivar          | Australia         | 10.1038/s41586-020-2961-x |
| Mace                    | <i>T. aestivum</i> L. subsp. <i>aestivum</i>                   | winter       | cultivar          | Australia         | 10.1038/s41586-020-2961-x |
| Norin 61                | <i>T. aestivum</i> L. subsp. <i>aestivum</i>                   | winter       | cultivar          | Japan             | 10.1038/s41586-020-2961-x |
| Paragon                 | <i>T. aestivum</i> L. subsp. <i>aestivum</i>                   | spring       | cultivar          | UK England        | 10.1038/s41586-020-2961-x |
| Robigus                 | <i>T. aestivum</i> L. subsp. <i>aestivum</i>                   | winter       | cultivar          | UK England        | 10.1038/s41586-020-2961-x |
| Spelt (PI 190962)       | <i>T. aestivum</i> L. subsp. <i>spelta</i> (L.) Thell.         | spring       | uncertain         | Italy             | 10.1038/s41586-020-2961-x |
| SY Mattis               | <i>T. aestivum</i> L. subsp. <i>aestivum</i>                   | winter       | cultivar          | France            | 10.1038/s41586-020-2961-x |
| Urartu G1812 (PI428198) | <i>T. urartu</i> Tumanian ex Gandilyan                         | winter       | wild              | Turkey            | 10.1038/s41586-018-0108-0 |
| Zavitan                 | <i>T. turgidum</i> ssp. <i>dicoccoides</i> (Körn.) Thell.      | winter       | wild              | Israel            | 10.1126/science.aan0032   |
