# Supplementary material for: Alleles of the GRF3-2A Gene in Wheat and Their Agronomic Value
Source: MDPI journal article supplement (doi:10.3390/ijms222212376), 2021-11-16
Supplement: s1 [file s1]

**Table S7.** Agronomic traits of winter wheat accessions in connection with c.495G>T polymorphism in *TaGRF3-2A* gene. Means and  $\pm 95\%$  confidence intervals are given.

| c.495G>T | Year                                   |                 |                 | Mean            |
|----------|----------------------------------------|-----------------|-----------------|-----------------|
|          | 2018                                   | 2019            | 2020            |                 |
|          | <b>Grain yield, t/ha</b>               |                 |                 |                 |
| <b>G</b> | 8,8 $\pm$ 0,4                          | 7,5 $\pm$ 0,2   | 10,2 $\pm$ 0,3  | 8,9 $\pm$ 0,2   |
| <b>T</b> | 8,2 $\pm$ 0,4                          | 7,5 $\pm$ 0,3   | 10,3 $\pm$ 0,3  | 8,7 $\pm$ 0,2   |
|          | <b>Heading date, days after sowing</b> |                 |                 |                 |
| <b>G</b> | 198 $\pm$ 0,8                          | 203 $\pm$ 0,7   | 205 $\pm$ 0,9   | 202 $\pm$ 0,4   |
| <b>T</b> | 197 $\pm$ 0,7                          | 202 $\pm$ 0,8   | 203 $\pm$ 0,9   | 201 $\pm$ 0,5   |
|          | <b>Test weight, g/l</b>                |                 |                 |                 |
| <b>G</b> | 783 $\pm$ 4                            | 731 $\pm$ 7     | 801 $\pm$ 6     | 771 $\pm$ 3     |
| <b>T</b> | 789 $\pm$ 4                            | 745 $\pm$ 5     | 817 $\pm$ 4     | 784 $\pm$ 4     |
|          | <b>1000 kernel weight, g</b>           |                 |                 |                 |
| <b>G</b> | 42,4 $\pm$ 0,7                         | 34,8 $\pm$ 0,6  | 36,3 $\pm$ 0,9  | 37,8 $\pm$ 0,4  |
| <b>T</b> | 43,3 $\pm$ 0,8                         | 36,6 $\pm$ 0,7  | 37,4 $\pm$ 0,7  | 39,1 $\pm$ 0,5  |
|          | <b>Grain protein content, %</b>        |                 |                 |                 |
| <b>G</b> | 14,7 $\pm$ 0,2                         | 15,1 $\pm$ 0,2  | 13,6 $\pm$ 0,2  | 14,5 $\pm$ 0,1  |
| <b>T</b> | 15,1 $\pm$ 0,2                         | 15,1 $\pm$ 0,2  | 13,5 $\pm$ 0,2  | 14,6 $\pm$ 0,1  |
|          | <b>Protein yield, t/ha</b>             |                 |                 |                 |
| <b>G</b> | 1,29 $\pm$ 0,05                        | 1,14 $\pm$ 0,03 | 1,38 $\pm$ 0,03 | 1,27 $\pm$ 0,02 |
| <b>T</b> | 1,23 $\pm$ 0,06                        | 1,14 $\pm$ 0,03 | 1,38 $\pm$ 0,03 | 1,25 $\pm$ 0,02 |

**Table S8.** Agronomic traits of winter wheat accessions in connection with a microsatellite marker in the 5'UTR of the *TaGRF3-2A* gene. Means and  $\pm 95\%$  confidence intervals are given.

| GRF-2A-SSR               | Year      |          |          | Mean     |
|--------------------------|-----------|----------|----------|----------|
|                          | 2018      | 2019     | 2020     |          |
| Grain yield, t/ha        |           |          |          |          |
| 254                      | 8,3±1,2   | 7,5±0,7  | 10,8±1,2 | 8,8±0,6  |
| 258                      | 8,2±0,3   | 7,6±0,2  | 10,5±0,3 | 8,7±0,2  |
| 266                      | 10,8±1,4  | 7,3±0,8  | 10,7±0,5 | 9,4±0,6  |
| 270                      | 10±1,3    | 7,6±0,7  | 10,8±1   | 9,5±0,5  |
| 274                      | 8±1,5     | 6,9±1,1  | 9,9±1,1  | 8,3±0,6  |
| 277                      | 7,9±0,7   | 7,2±0,5  | 10,3±0,6 | 8,5±0,3  |
| 280                      | 11,1±0,3  | 7,5±1,3  | 9,5±1,6  | 9,4±0,6  |
| 283                      | 9,8±1,1   | 8,2±0,4  | 10,7±0,6 | 9,4±0,4  |
| 286                      | 9,2±1,2   | 7,4±2,8  | 9,7±1,1  | 8,8±0,9  |
| Test weight, g/l         |           |          |          |          |
| 254                      | 791±11    | 747±19   | 825±7    | 825±7    |
| 258                      | 788±4     | 745±4    | 819±4    | 819±4    |
| 266                      | 769±16    | 714±34   | 798±31   | 798±31   |
| 270                      | 775±20    | 707±35   | 786±33   | 786±33   |
| 274                      | 785±15    | 749±21   | 808±20   | 808±20   |
| 277                      | 784±6     | 733±10   | 800±15   | 800±15   |
| 280                      | 771±23    | 672±33   | 751±47   | 751±47   |
| 283                      | 783±8     | 719±20   | 793±21   | 793±21   |
| 286                      | 779±9     | 733±42   | 805±58   | 805±58   |
| 1000 kernel weight, g    |           |          |          |          |
| 254                      | 38,5±4    | 32,9±2,5 | 35,2±4,8 | 35,5±1,6 |
| 258                      | 43,3±0,7  | 36,4±0,6 | 37,7±0,6 | 39,2±0,4 |
| 266                      | 45,7±3    | 38,7±2,1 | 38,4±1,7 | 40,6±1,6 |
| 270                      | 42,7±2,8  | 33,6±3,2 | 37,3±3,6 | 37,9±1,3 |
| 274                      | 42,7±3,8  | 37,1±2,3 | 37,4±4,4 | 39,1±1,5 |
| 277                      | 43,7±1,1  | 35,8±1,1 | 37,2±1,9 | 38,9±0,7 |
| 280                      | 39,3±2,8  | 30,4±1,4 | 30,8±2,1 | 34,8±1,5 |
| 283                      | 41,2±2    | 33,6±1,8 | 34,5±3   | 36,6±0,9 |
| 286                      | 42,3±17,2 | 33±17,6  | 31,5±7,9 | 35,6±2,2 |
| Grain protein content, % |           |          |          |          |
| 254                      | 15,4±2    | 15,9±1,1 | 13,4±1,8 | 14,9±0,5 |
| 258                      | 15±0,2    | 15±0,2   | 13,3±0,2 | 14,5±0,1 |
| 266                      | 14,8±1    | 15,1±1,1 | 13,5±1   | 14,7±0,5 |
| 270                      | 14±0,6    | 15,1±0,7 | 13,4±0,6 | 14,2±0,4 |
| 274                      | 14,9±1,2  | 15±0,8   | 13,6±0,6 | 14,5±0,5 |
| 277                      | 14,9±0,4  | 15,2±0,4 | 13,6±0,6 | 14,5±0,2 |
| 280                      | 13,9±0,4  | 15,2±1   | 13,7±1   | 14,4±0,5 |
| 283                      | 14,5±0,7  | 14,8±0,5 | 13,6±0,7 | 14,4±0,3 |
| 286                      | 14,6±2,4  | 14,9±0,8 | 13,9±2,3 | 14,5±0,7 |
