# Supplementary material for: Alleles of the GRF3-2A Gene in Wheat and Their Agronomic Value
Source: MDPI journal article supplement (doi:10.3390/ijms222212376), 2021-11-16
Supplement: s1 [file s1]

**Table S2.** *TaGRF3-2A* alleles and GRF3 protein isoforms in wheat accessions

| Species               | Accession                  | Allele  | Protein isoform | Sequence source* |
|-----------------------|----------------------------|---------|-----------------|------------------|
| <i>T. aestivum</i>    | Al-Murug                   | a.2     | A               | S                |
| <i>T. aestivum</i>    | Altigo                     | a.4     | A               | S                |
| <i>T. aestivum</i>    | ArinaLrFor                 | a.3     | A               | G                |
| <i>T. aestivum</i>    | Cadenza                    | a.3     | A               | G                |
| <i>T. aestivum</i>    | CDC Landmark               | a.10    | A               | G                |
| <i>T. aestivum</i>    | CDC Stanley                | a.14    | A               | G                |
| <i>T. aestivum</i>    | Chinese Spring             | a.1     | A               | G                |
| <i>T. aestivum</i>    | Claire                     | a.11    | A               | G                |
| <i>T. aestivum</i>    | Grom                       | a.4     | A               | S                |
| <i>T. aestivum</i>    | Iraq                       | a.7     | A               | S                |
| <i>T. aestivum</i>    | Jagger                     | a.5     | A               | G                |
| <i>T. aestivum</i>    | Julius                     | a.3     | A               | G                |
| <i>T. aestivum</i>    | Lancer                     | a.9     | A               | G                |
| <i>T. aestivum</i>    | Mace                       | a.5     | A               | G                |
| <i>T. aestivum</i>    | Norin 61                   | a.15    | A               | G                |
| <i>T. aestivum</i>    | Paragon                    | a.13    | A               | G                |
| <i>T. aestivum</i>    | Robigus                    | a.1     | A               | G                |
| <i>T. aestivum</i>    | Romy                       | a.1     | A               | S                |
| <i>T. aestivum</i>    | Saratovskaya 29            | a.8     | A               | S                |
| <i>T. aestivum</i>    | Sila                       | a.2     | A               | S                |
| <i>T. aestivum</i>    | SY Mattis                  | a.12    | A               | G                |
| <i>T. aestivum</i>    | Tamuz 3                    | a.2     | A               | S                |
| <i>T. aestivum</i>    | Velena                     | a.6     | A               | S                |
| <i>T. aestivum</i>    | Alekseich                  | b.1     | B               | S                |
| <i>T. aestivum</i>    | Doka                       | b.1     | B               | S                |
| <i>T. aestivum</i>    | Fisht                      | b.2     | B               | S                |
| <i>T. aestivum</i>    | L.2877k58                  | b.4     | B               | S                |
| <i>T. aestivum</i>    | Proton                     | b.1     | B               | S                |
| <i>T. aestivum</i>    | Stan                       | b.2     | B               | S                |
| <i>T. aestivum</i>    | Starshina                  | b.5/b.2 | B               | S                |
| <i>T. aestivum</i>    | Vassa                      | b.3     | B               | S                |
| <i>T. aestivum</i>    | Vid                        | b.1     | B               | S                |
| <i>T. aestivum</i>    | Novosibirskaya 67          | d.1     | D               | S                |
| <i>T. dicoccoides</i> | Zavitan (wild emmer wheat) | a.16    | A               | G                |
| <i>T. durum</i>       | Kronos (durum wheat)       | a.1     | A               | G                |
| <i>T. spelta</i>      | PI190962 (spelt wheat)     | a.17    | A               | G                |
| <i>T. urartu</i>      | PI428198 (einkorn wheat)   | c.1     | C               | G                |

*T. aestivum* = *Triticum aestivum* L. subsp. *aestivum*; *T. sphaerococum* = *Triticum aestivum* L. subsp. *sphaerococum* (Percival) Mac Key; *T. urartu* = *Triticum urartu* Tumanian ex Gandilyan; *T. dicoccoides* = *Triticum turgidum* ssp. *dicoccoides*; *T. durum* = *Triticum turgidum* L. subsp. *durum* (Desf.) van Slageren; *T. spelta* = *Triticum aestivum* L. subsp. *spelta* (L.) Thell.

\* S – the original sequences obtained by the authors (see Materials and methods); G – the sequences found by BLAST search in previously sequenced and assembled genomes.

**Table S3.** Frequencies of *GRF3-2A* alleles among sequenced<sup>1</sup> wheat accessions

| Alleles of <i>GRF3-2A</i> | Allele frequencies for |                                                                   |                                                                        |                                                                 |
|---------------------------|------------------------|-------------------------------------------------------------------|------------------------------------------------------------------------|-----------------------------------------------------------------|
|                           | all accessions         | all bread wheat<br>( <i>T. aestivum</i> ssp.<br><i>aestivum</i> ) | bread wheat from<br>Lukyanenko<br>National Grain<br>Center (Krasnodar) | bread wheat<br>from other<br>sources (not<br>from<br>Krasnodar) |
| a.1                       | 0.11                   | 0.09                                                              | 0.00                                                                   | 0.14                                                            |
| a.2                       | 0.08                   | 0.09                                                              | 0.09                                                                   | 0.10                                                            |
| a.3                       | 0.08                   | 0.09                                                              | 0.00                                                                   | 0.14                                                            |
| a.4                       | 0.05                   | 0.06                                                              | 0.09                                                                   | 0.05                                                            |
| a.5                       | 0.05                   | 0.06                                                              | 0.00                                                                   | 0.10                                                            |
| a.6                       | 0.03                   | 0.03                                                              | 0.09                                                                   | 0.00                                                            |
| a.7                       | 0.03                   | 0.03                                                              | 0.00                                                                   | 0.05                                                            |
| a.8                       | 0.03                   | 0.03                                                              | 0.00                                                                   | 0.05                                                            |
| a.9                       | 0.03                   | 0.03                                                              | 0.00                                                                   | 0.05                                                            |
| a.10                      | 0.03                   | 0.03                                                              | 0.00                                                                   | 0.05                                                            |
| a.11                      | 0.03                   | 0.03                                                              | 0.00                                                                   | 0.05                                                            |
| a.12                      | 0.03                   | 0.03                                                              | 0.00                                                                   | 0.05                                                            |
| a.13                      | 0.03                   | 0.03                                                              | 0.00                                                                   | 0.05                                                            |
| a.14                      | 0.03                   | 0.03                                                              | 0.00                                                                   | 0.05                                                            |
| a.15                      | 0.03                   | 0.03                                                              | 0.00                                                                   | 0.05                                                            |
| a.16                      | 0.03                   | 0.00                                                              | 0.00                                                                   | 0.00                                                            |
| a.17                      | 0.03                   | 0.00                                                              | 0.00                                                                   | 0.00                                                            |
| b.1                       | 0.11                   | 0.12                                                              | 0.36                                                                   | 0.00                                                            |
| b.2                       | 0.07                   | 0.08                                                              | 0.18                                                                   | 0.00                                                            |
| b.3                       | 0.03                   | 0.03                                                              | 0.09                                                                   | 0.00                                                            |
| b.4                       | 0.03                   | 0.03                                                              | 0.09                                                                   | 0.00                                                            |
| b.5                       | 0.01                   | 0.02                                                              | 0.00                                                                   | 0.00                                                            |
| c.1                       | 0.03                   | 0.00                                                              | 0.00                                                                   | 0.00                                                            |
| d.1                       | 0.03                   | 0.03                                                              | 0.00                                                                   | 0.05                                                            |
| Number of<br>accessions   | 37                     | 33                                                                | 12                                                                     | 21                                                              |

<sup>1</sup> – *GRF3-2A* gene was target-sequenced for these accessions or sequence of it was obtained from available genome sequence.
