# Supplementary material for: Alleles of the GRF3-2A Gene in Wheat and Their Agronomic Value
Source: MDPI journal article supplement (doi:10.3390/ijms222212376), 2021-11-16
Supplement: s1 [file s1]

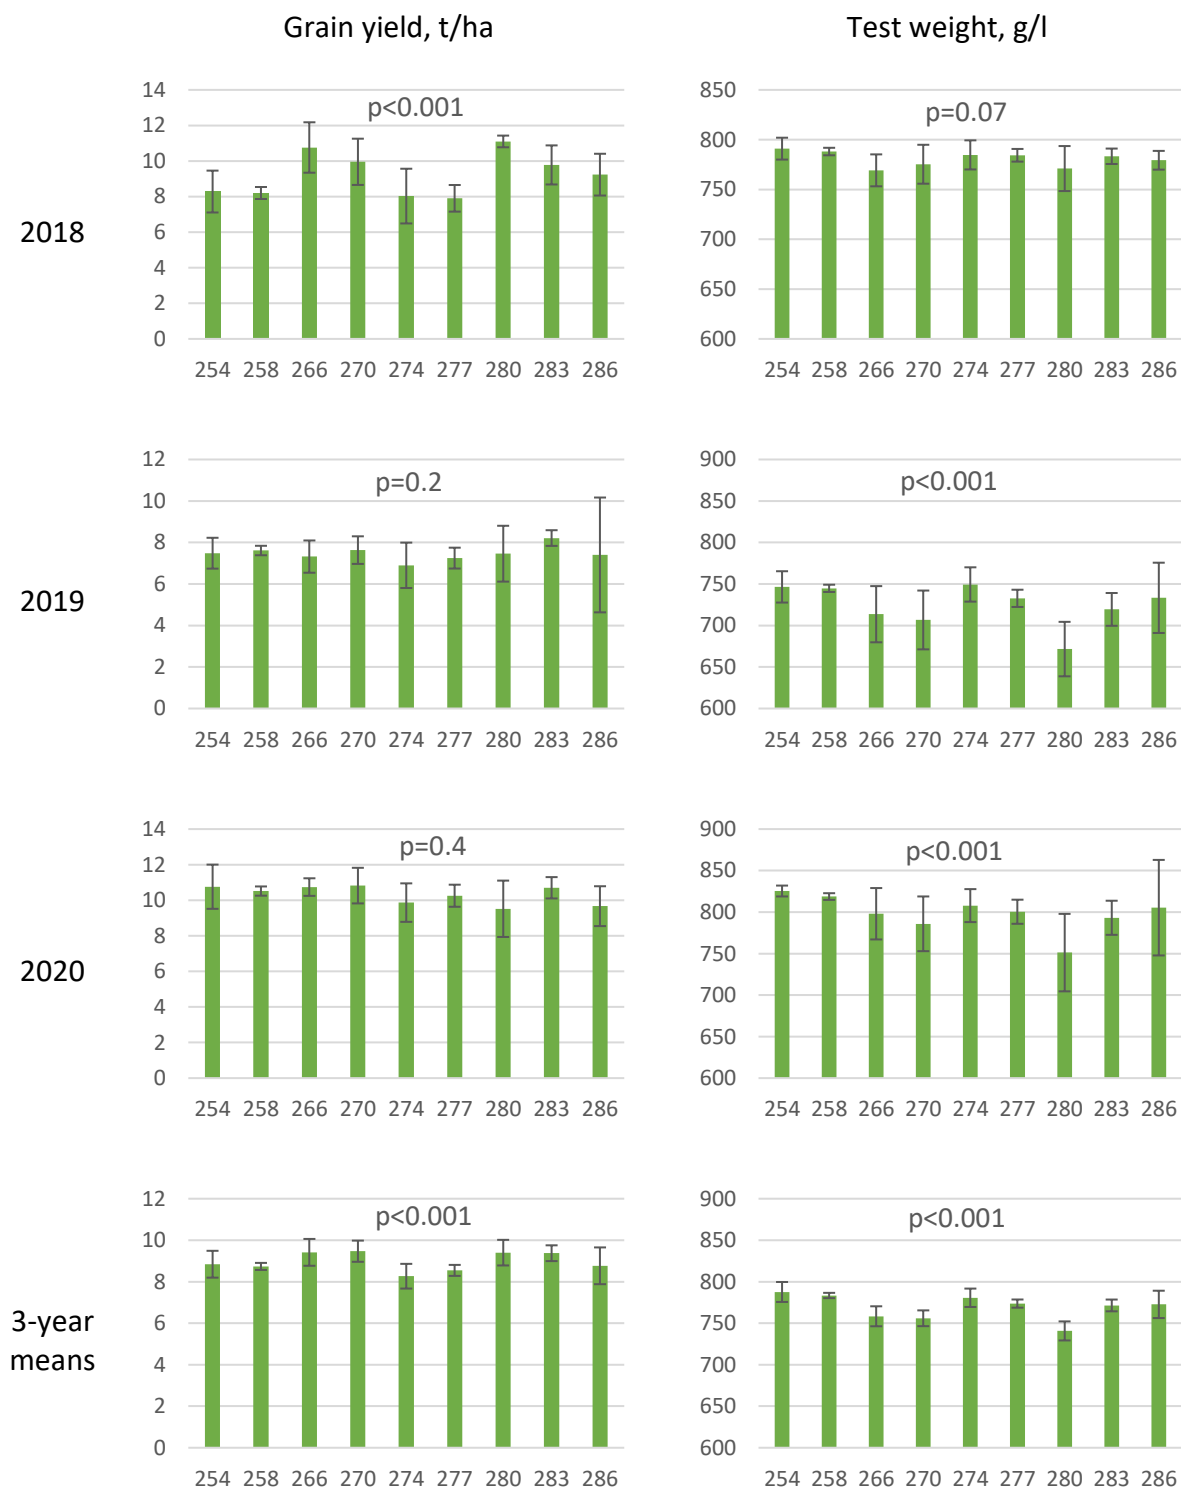

**Figure S3.** Yield and test weight for wheat accessions differing in size of a microsatellite in the 5'UTR of the *GRF3-2A* gene during three years (2018-2020) at Krasnodar. Sizes of the microsatellite marker GRF3-2AD-SSR detected by fragment analysis are indicated on x-axis. Bars indicate 95% confidence intervals. The p-values are calculated by one-way analysis of variance (ANOVA) and Fisher's F-test.

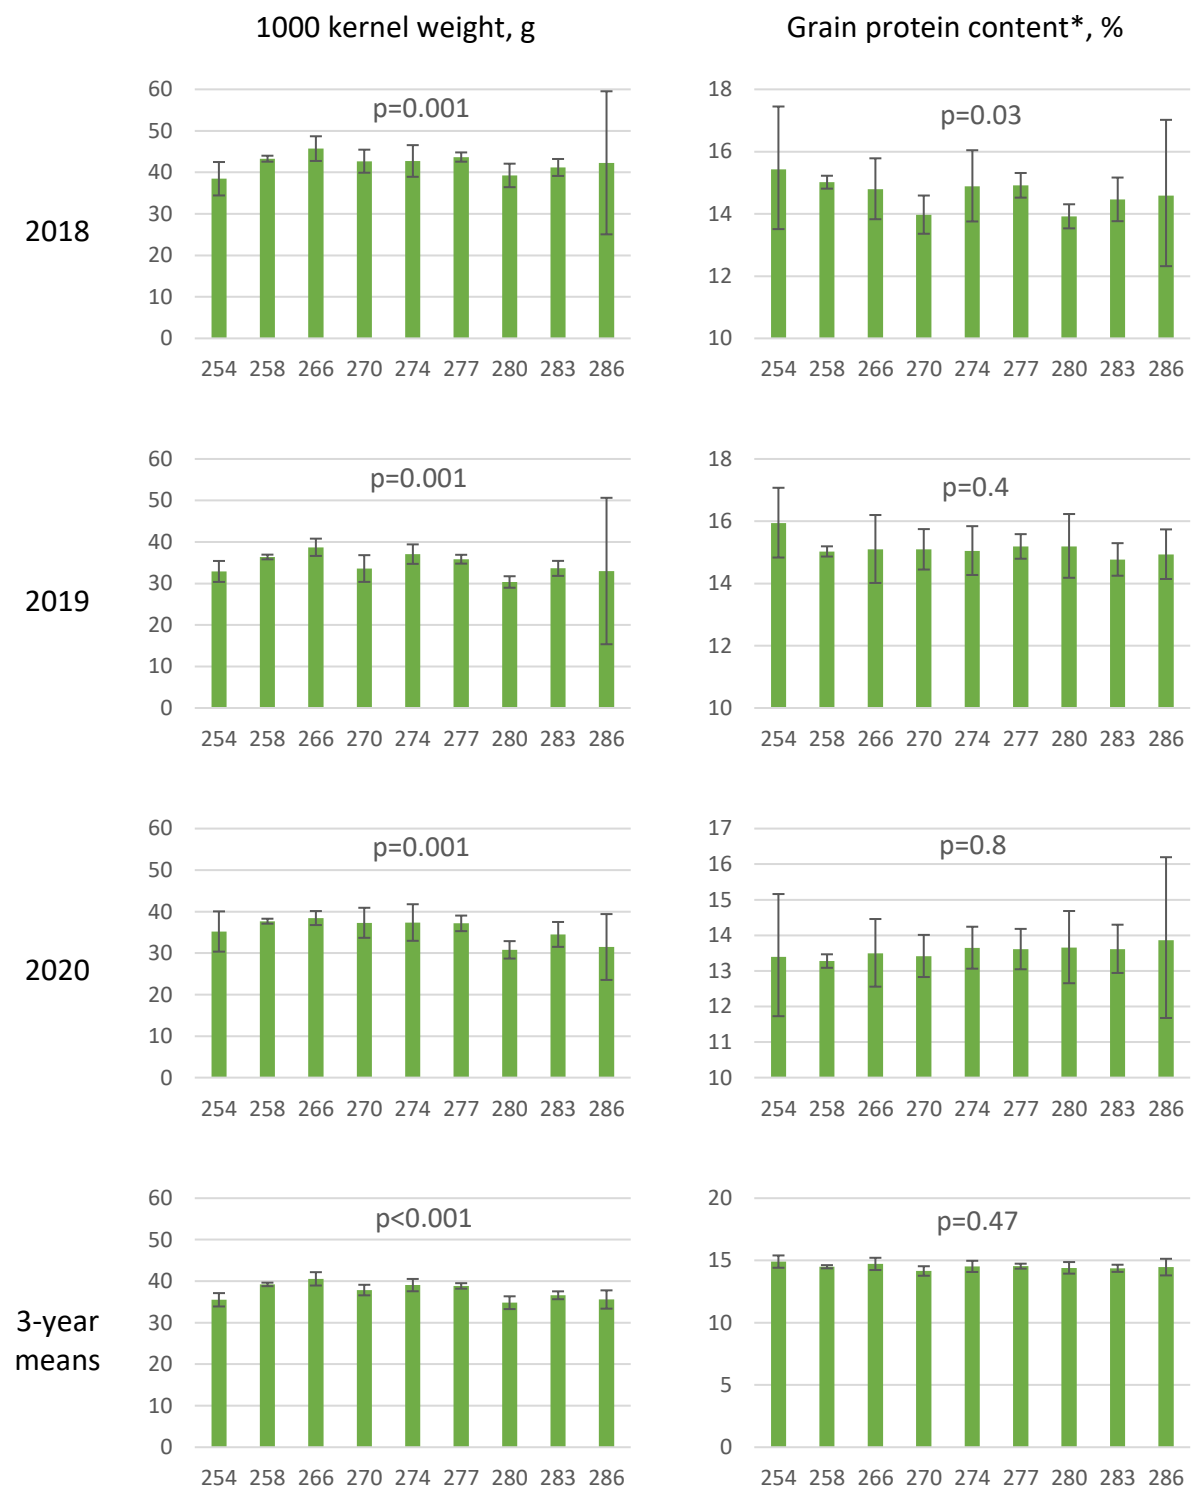

**Figure S4.** 1000 kernel weight and grain protein content for wheat accessions differing in size of the microsatellite in the 5'UTR of the *GRF3-2A* gene during three years (2018-2020) at Krasnodar. Sizes of the microsatellite marker GRF3-2AD-SSR detected by fragment analysis are indicated on x-axis. Bars indicate 95% confidence intervals. The p-values are calculated by one-way analysis of variance (ANOVA) and Fisher's F-test. Values of the grain protein content were transformed using  $\arcsin(\sqrt{x/100})$  before ANOVA. The reverse-transformed means and boundaries of confidence intervals are shown on histogram.
