# Supplementary material for: Alleles of the GRF3-2A Gene in Wheat and Their Agronomic Value
Source: MDPI journal article supplement (doi:10.3390/ijms222212376), 2021-11-16
Supplement: s1 [file s1]

**Table S4.** Wheat accessions used for *GRF3-2A* genotyping using molecular markers

| No | Accession name     | Species <sup>1</sup> | Growth habit | Country of origin | Locality  | Reference, pedigree                                                                                 |
|----|--------------------|----------------------|--------------|-------------------|-----------|-----------------------------------------------------------------------------------------------------|
| 1  | 06380AR83          | <i>T. aest.</i>      | winter       | Russia            | Krasnodar |                                                                                                     |
| 2  | 4023W5             | <i>T. aest.</i>      | winter       | Russia            | Krasnodar |                                                                                                     |
| 3  | 5577h56G10         | <i>T. aest.</i>      | winter       | Russia            | Krasnodar |                                                                                                     |
| 4  | 609sv25            | <i>T. aest.</i>      | winter       | Russia            | Krasnodar |                                                                                                     |
| 5  | 7675h34-23         | <i>T. aest.</i>      | winter       | Russia            | Krasnodar |                                                                                                     |
| 6  | 7675h34-34         | <i>T. aest.</i>      | winter       | Russia            | Krasnodar |                                                                                                     |
| 7  | ACPG 154           | <i>T. aest.</i>      | winter       | Russia            | Moscow    | <a href="https://reestr.gossortrf.ru/sorts/8260623/">https://reestr.gossortrf.ru/sorts/8260623/</a> |
| 8  | Adel               | <i>T. aest.</i>      | winter       | Russia            | Krasnodar | <a href="http://wheatpedigree.net/sort/show/115868">http://wheatpedigree.net/sort/show/115868</a>   |
| 9  | Afina              | <i>T. aest.</i>      | intermediate | Russia            | Krasnodar | <a href="http://wheatpedigree.net/sort/show/83082">http://wheatpedigree.net/sort/show/83082</a>     |
| 10 | Aivina             | <i>T. aest.</i>      | winter       | Russia            | Krasnodar | <a href="http://wheatpedigree.net/sort/show/85764">http://wheatpedigree.net/sort/show/85764</a>     |
| 11 | Alekseich          | <i>T. aest.</i>      | winter       | Russia            | Krasnodar | <a href="https://reestr.gossortrf.ru/sorts/8556858/">https://reestr.gossortrf.ru/sorts/8556858/</a> |
| 12 | Altigo             | <i>T. aest.</i>      | winter       | France            |           | <a href="http://wheatpedigree.net/sort/show/110689">http://wheatpedigree.net/sort/show/110689</a>   |
| 13 | Anastasiya         | <i>T. aest.</i>      | winter       | Russia            | Saratov   | <a href="https://reestr.gossortrf.ru/sorts/8458032/">https://reestr.gossortrf.ru/sorts/8458032/</a> |
| 14 | Antonina           | <i>T. aest.</i>      | winter       | Russia            | Krasnodar | <a href="http://wheatpedigree.net/sort/show/117445">http://wheatpedigree.net/sort/show/117445</a>   |
| 15 | Apache             | <i>T. aest.</i>      | winter       | France            |           | <a href="http://wheatpedigree.net/sort/show/79265">http://wheatpedigree.net/sort/show/79265</a>     |
| 16 | Armada             | <i>T. aest.</i>      | winter       | Russia            | Stavropol | <a href="https://reestr.gossortrf.ru/sorts/8356459/">https://reestr.gossortrf.ru/sorts/8356459/</a> |
| 17 | Arsenal            | <i>T. aest.</i>      | winter       | Russia            | Stavropol | <a href="https://reestr.gossortrf.ru/sorts/8354653/">https://reestr.gossortrf.ru/sorts/8354653/</a> |
| 18 | Astarta            | <i>T. aest.</i>      | winter       | Ukraine           | Kiev      | <a href="http://wheatpedigree.net/sort/show/117865">http://wheatpedigree.net/sort/show/117865</a>   |
| 19 | Bagrat             | <i>T. aest.</i>      | winter       | Russia            | Krasnodar | <a href="http://wheatpedigree.net/sort/show/116998">http://wheatpedigree.net/sort/show/116998</a>   |
| 20 | Balitus            | <i>T. aest.</i>      | winter       | Austria           |           | <a href="https://reestr.gossortrf.ru/sorts/8556863/">https://reestr.gossortrf.ru/sorts/8556863/</a> |
| 21 | Barok              | <i>T. aest.</i>      | winter       | France            |           |                                                                                                     |
| 22 | Bazis              | <i>T. aest.</i>      | winter       | Russia            | Samara    | <a href="https://reestr.gossortrf.ru/sorts/8558188/">https://reestr.gossortrf.ru/sorts/8558188/</a> |
| 23 | Bet B 8 14         | <i>T. aest.</i>      | winter       | Bulgaria          | Sofia     | <a href="https://reestr.gossortrf.ru/sorts/8260772/">https://reestr.gossortrf.ru/sorts/8260772/</a> |
| 24 | Bezenchukskaya 380 | <i>T. aest.</i>      | winter       | Russia            | Samara    | <a href="http://wheatpedigree.net/sort/show/6992">http://wheatpedigree.net/sort/show/6992</a>       |
| 25 | Bezostaya 1        | <i>T. aest.</i>      | winter       | Russia            | Krasnodar | <a href="http://wheatpedigree.net/sort/show/7007">http://wheatpedigree.net/sort/show/7007</a>       |
| 26 | Bezostaya 100      | <i>T. aest.</i>      | winter       | Russia            | Krasnodar | <a href="https://reestr.gossortrf.ru/sorts/8556857/">https://reestr.gossortrf.ru/sorts/8556857/</a> |

|    |                          |                 |        |                |              |                                                                                                     |
|----|--------------------------|-----------------|--------|----------------|--------------|-----------------------------------------------------------------------------------------------------|
| 27 | Bis                      | <i>T. aest.</i> | winter | Russia         | Vladimir     | <a href="http://wheatpedigree.net/sort/show/112371">http://wheatpedigree.net/sort/show/112371</a>   |
| 28 | Bodryi                   | <i>T. aest.</i> | winter | Russia         | Moscow       | <a href="https://reestr.gossortrf.ru/sorts/8354640/">https://reestr.gossortrf.ru/sorts/8354640/</a> |
| 29 | Bohemia                  | <i>T. aest.</i> | winter | Czech Republic | Sibřina      | <a href="http://wheatpedigree.net/sort/show/91679">http://wheatpedigree.net/sort/show/91679</a>     |
| 30 | Boyarynya                | <i>T. aest.</i> | winter | Russia         | Rostov       | <a href="http://wheatpedigree.net/sort/show/117380">http://wheatpedigree.net/sort/show/117380</a>   |
| 31 | Brigada                  | <i>T. aest.</i> | winter | Russia         | Krasnodar    | <a href="http://wheatpedigree.net/sort/show/96315">http://wheatpedigree.net/sort/show/96315</a>     |
| 32 | BT 2375 p 15             | <i>T. aest.</i> | winter | unknown        |              |                                                                                                     |
| 33 | BT 2385 p 15             | <i>T. aest.</i> | winter | unknown        |              |                                                                                                     |
| 34 | Butterfly                | <i>T. aest.</i> | winter | Czech Republic | Sibřina      | <a href="https://reestr.gossortrf.ru/sorts/8152807/">https://reestr.gossortrf.ru/sorts/8152807/</a> |
| 35 | Bylina Dona              | <i>T. aest.</i> | winter | Russia         | Rostov       | <a href="https://reestr.gossortrf.ru/sorts/8356468/">https://reestr.gossortrf.ru/sorts/8356468/</a> |
| 36 | Caphorn                  | <i>T. aest.</i> | winter | UK             |              | <a href="http://wheatpedigree.net/sort/show/79045">http://wheatpedigree.net/sort/show/79045</a>     |
| 37 | Cheget                   | <i>T. aest.</i> | winter | Russia         | Krasnodar    | <a href="http://wheatpedigree.net/sort/show/83196">http://wheatpedigree.net/sort/show/83196</a>     |
| 38 | Chornyava                | <i>T. aest.</i> | winter | Ukraine        | Kiev         | <a href="http://wheatpedigree.net/sort/show/113665">http://wheatpedigree.net/sort/show/113665</a>   |
| 39 | Clarion                  | <i>T. aest.</i> | winter | Germany        |              | <a href="http://wheatpedigree.net/sort/show/114338">http://wheatpedigree.net/sort/show/114338</a>   |
| 40 | Crimson                  | <i>T. aest.</i> | winter | USA            | South-Dakota | <a href="http://wheatpedigree.net/sort/show/72051">http://wheatpedigree.net/sort/show/72051</a>     |
| 41 | Dagmar                   | <i>T. aest.</i> | winter | Czech Republic |              | <a href="http://wheatpedigree.net/sort/show/113244">http://wheatpedigree.net/sort/show/113244</a>   |
| 42 | Desamo                   | <i>T. aest.</i> | winter | Germany        |              | <a href="http://wheatpedigree.net/sort/show/118984">http://wheatpedigree.net/sort/show/118984</a>   |
| 43 | Deya                     | <i>T. aest.</i> | winter | Russia         | Krasnodar    | <a href="http://wheatpedigree.net/sort/show/75797">http://wheatpedigree.net/sort/show/75797</a>     |
| 44 | Dmitrii                  | <i>T. aest.</i> | winter | Russia         | Krasnodar    | <a href="http://wheatpedigree.net/sort/show/88957">http://wheatpedigree.net/sort/show/88957</a>     |
| 45 | Dolya                    | <i>T. aest.</i> | winter | Russia         | Krasnodar    | <a href="http://wheatpedigree.net/sort/show/115870">http://wheatpedigree.net/sort/show/115870</a>   |
| 46 | Don 93                   | <i>T. aest.</i> | winter | Russia         | Rostov       | <a href="http://wheatpedigree.net/sort/show/69604">http://wheatpedigree.net/sort/show/69604</a>     |
| 47 | Don 95                   | <i>T. aest.</i> | winter | Russia         | Rostov       | <a href="http://wheatpedigree.net/sort/show/69913">http://wheatpedigree.net/sort/show/69913</a>     |
| 48 | Donmira                  | <i>T. aest.</i> | winter | Russia         | Rostov       | <a href="https://reestr.gossortrf.ru/sorts/8354656/">https://reestr.gossortrf.ru/sorts/8354656/</a> |
| 49 | Donna                    | <i>T. aest.</i> | winter | Russia         | Rostov       | <a href="http://wheatpedigree.net/sort/show/92274">http://wheatpedigree.net/sort/show/92274</a>     |
| 50 | Donskaya Lira            | <i>T. aest.</i> | winter | Russia         | Rostov       | <a href="http://wheatpedigree.net/sort/show/88958">http://wheatpedigree.net/sort/show/88958</a>     |
| 51 | Donskaya Polukarlikovaya | <i>T. aest.</i> | winter | Russia         | Rostov       | <a href="http://wheatpedigree.net/sort/show/16895">http://wheatpedigree.net/sort/show/16895</a>     |
| 52 | Donskaya Step'           | <i>T. aest.</i> | winter | Russia         | Rostov       | <a href="https://reestr.gossortrf.ru/sorts/8260596/">https://reestr.gossortrf.ru/sorts/8260596/</a> |
| 53 | Donskaya Yubileinaya     | <i>T. aest.</i> | winter | Russia         | Rostov       | <a href="http://wheatpedigree.net/sort/show/16896">http://wheatpedigree.net/sort/show/16896</a>     |
| 54 | Donstar                  | <i>T. aest.</i> | winter | Russia         | Rostov       | <a href="http://wheatpedigree.net/sort/show/114157">http://wheatpedigree.net/sort/show/114157</a>   |

|    |                             |                   |              |         |              |                                                                                                     |
|----|-----------------------------|-------------------|--------------|---------|--------------|-----------------------------------------------------------------------------------------------------|
| 55 | DSV-11-13 (Aspect)          | <i>T. aest.</i>   | winter       | Germany | Lippstadt    | <a href="http://wheatpedigree.net/sort/show/79510">http://wheatpedigree.net/sort/show/79510</a>     |
| 56 | Duplet                      | <i>T. aest.</i>   | winter       | Russia  | Krasnodar    | <a href="https://reestr.gossortrf.ru/sorts/8559198/">https://reestr.gossortrf.ru/sorts/8559198/</a> |
| 57 | Ekspromt                    | <i>T. aest.</i>   | winter       | Ukraine | Kiev         | <a href="http://wheatpedigree.net/sort/show/79912">http://wheatpedigree.net/sort/show/79912</a>     |
| 58 | Eremeevna                   | <i>T. sphaer.</i> | winter       | Russia  | Krasnodar    | <a href="http://wheatpedigree.net/sort/show/117048">http://wheatpedigree.net/sort/show/117048</a>   |
| 59 | Ermak                       | <i>T. aest.</i>   | winter       | Russia  | Rostov       | <a href="http://wheatpedigree.net/sort/show/78205">http://wheatpedigree.net/sort/show/78205</a>     |
| 60 | Esaul                       | <i>T. aest.</i>   | winter       | Russia  | Krasnodar    | <a href="http://wheatpedigree.net/sort/show/82560">http://wheatpedigree.net/sort/show/82560</a>     |
| 61 | Etnos                       | <i>T. aest.</i>   | winter       | Russia  | Krasnodar    | <a href="http://wheatpedigree.net/sort/show/96333">http://wheatpedigree.net/sort/show/96333</a>     |
| 62 | Euclide                     | <i>T. aest.</i>   | winter       | France  |              | <a href="http://wheatpedigree.net/sort/show/119016">http://wheatpedigree.net/sort/show/119016</a>   |
| 63 | Favoritka                   | <i>T. aest.</i>   | winter       | Ukraine | Kiev         | <a href="http://wheatpedigree.net/sort/show/83142">http://wheatpedigree.net/sort/show/83142</a>     |
| 64 | Fenomen                     | <i>T. aest.</i>   | winter       | Poland  | Łochów       |                                                                                                     |
| 65 | Flamenko                    | <i>T. aest.</i>   | winter       | France  |              |                                                                                                     |
| 66 | Fontanka                    | <i>T. aest.</i>   | winter       | Ukraine |              | <a href="https://reestr.gossortrf.ru/sorts/8757442/">https://reestr.gossortrf.ru/sorts/8757442/</a> |
| 67 | Fortuna                     | <i>T. aest.</i>   | winter       | Russia  | Krasnodar    | <a href="http://wheatpedigree.net/sort/show/82576">http://wheatpedigree.net/sort/show/82576</a>     |
| 68 | Gileya                      | <i>T. aest.</i>   | winter       | Ukraine | Kiev         | <a href="http://wheatpedigree.net/sort/show/117879">http://wheatpedigree.net/sort/show/117879</a>   |
| 69 | Gordian                     | <i>T. aest.</i>   | winter       | Germany |              | <a href="http://wheatpedigree.net/sort/show/119044">http://wheatpedigree.net/sort/show/119044</a>   |
| 70 | Graf                        | <i>T. aest.</i>   | winter       | Russia  | Krasnodar    | <a href="https://reestr.gossortrf.ru/sorts/8559195/">https://reestr.gossortrf.ru/sorts/8559195/</a> |
| 71 | Gratsiya                    | <i>T. aest.</i>   | winter       | Russia  | Krasnodar    | <a href="http://wheatpedigree.net/sort/show/83086">http://wheatpedigree.net/sort/show/83086</a>     |
| 72 | Grom                        | <i>T. aest.</i>   | winter       | Russia  | Krasnodar    | <a href="http://wheatpedigree.net/sort/show/85804">http://wheatpedigree.net/sort/show/85804</a>     |
| 73 | Gubernator Dona             | <i>T. aest.</i>   | winter       | Russia  | Rostov       | <a href="http://wheatpedigree.net/sort/show/88159">http://wheatpedigree.net/sort/show/88159</a>     |
| 74 | Gurt                        | <i>T. aest.</i>   | winter       | Russia  | Krasnodar    | <a href="http://wheatpedigree.net/sort/show/118485">http://wheatpedigree.net/sort/show/118485</a>   |
| 75 | Hadm 25612-02               | <i>T. aest.</i>   | winter       | Germany | Hadmersleben |                                                                                                     |
| 76 | Inea                        | <i>T. aest.</i>   | winter       | Russia  | Moscow       | <a href="https://reestr.gossortrf.ru/sorts/8152818/">https://reestr.gossortrf.ru/sorts/8152818/</a> |
| 77 | Iridium                     | <i>T. aest.</i>   | winter       | France  |              | <a href="http://wheatpedigree.net/sort/show/110759">http://wheatpedigree.net/sort/show/110759</a>   |
| 78 | Irishka                     | <i>T. aest.</i>   | winter       | Russia  | Krasnodar    | <a href="http://wheatpedigree.net/sort/show/85768">http://wheatpedigree.net/sort/show/85768</a>     |
| 79 | Iststar (Lipetskaya zvezda) | <i>T. aest.</i>   | winter       | Germany |              | <a href="https://reestr.gossortrf.ru/sorts/8556877/">https://reestr.gossortrf.ru/sorts/8556877/</a> |
| 80 | Julia                       | <i>T. aest.</i>   | winter       | Romania |              | <a href="http://wheatpedigree.net/sort/show/27862">http://wheatpedigree.net/sort/show/27862</a>     |
| 81 | Kalym                       | <i>T. aest.</i>   | winter       | Russia  | Krasnodar    | <a href="http://wheatpedigree.net/sort/show/88959">http://wheatpedigree.net/sort/show/88959</a>     |
| 82 | Karavan                     | <i>T. aest.</i>   | intermediate | Russia  | Krasnodar    | <a href="https://reestr.gossortrf.ru/sorts/8558567/">https://reestr.gossortrf.ru/sorts/8558567/</a> |

|     |                   |                 |        |         |             |                                                                                                     |
|-----|-------------------|-----------------|--------|---------|-------------|-----------------------------------------------------------------------------------------------------|
| 83  | Karillon          | <i>T. aest.</i> | winter | unknown |             |                                                                                                     |
| 84  | Kasatka           | <i>T. aest.</i> | winter | unknown |             |                                                                                                     |
| 85  | Kavkaz            | <i>T. aest.</i> | winter | Russia  | Krasnodar   | <a href="http://wheatpedigree.net/sort/show/31167">http://wheatpedigree.net/sort/show/31167</a>     |
| 86  | Knyaginya Olga    | <i>T. aest.</i> | winter | Ukraine | Odessa      | <a href="http://wheatpedigree.net/sort/show/96617">http://wheatpedigree.net/sort/show/96617</a>     |
| 87  | Kollega           | <i>T. aest.</i> | winter | Russia  | Krasnodar   | <a href="http://wheatpedigree.net/sort/show/83127">http://wheatpedigree.net/sort/show/83127</a>     |
| 88  | Kometa            | <i>T. aest.</i> | winter | Poland  | Krakow      | <a href="https://reestr.gossortrf.ru/sorts/8260948/">https://reestr.gossortrf.ru/sorts/8260948/</a> |
| 89  | Krasa Dona        | <i>T. aest.</i> | winter | Russia  | Rostov      | <a href="https://reestr.gossortrf.ru/sorts/8559203/">https://reestr.gossortrf.ru/sorts/8559203/</a> |
| 90  | Krasnodarskaya 6  | <i>T. aest.</i> | winter | Russia  | Krasnodar   | <a href="http://wheatpedigree.net/sort/show/32803">http://wheatpedigree.net/sort/show/32803</a>     |
| 91  | Krasnodarskaya 99 | <i>T. aest.</i> | winter | Russia  | Krasnodar   | <a href="http://wheatpedigree.net/sort/show/77550">http://wheatpedigree.net/sort/show/77550</a>     |
| 92  | Krasnoobskaya oz. | <i>T. aest.</i> | winter | Russia  | Novosibirsk | <a href="https://reestr.gossortrf.ru/sorts/8261651/">https://reestr.gossortrf.ru/sorts/8261651/</a> |
| 93  | Kurs              | <i>T. aest.</i> | winter | Russia  | Krasnodar   | <a href="http://wheatpedigree.net/sort/show/58819">http://wheatpedigree.net/sort/show/58819</a>     |
| 94  | KWS Barrel        | <i>T. aest.</i> | winter | UK      |             | <a href="http://wheatpedigree.net/sort/show/117959">http://wheatpedigree.net/sort/show/117959</a>   |
| 95  | KWS Siskin        | <i>T. aest.</i> | winter | UK      |             | <a href="http://wheatpedigree.net/sort/show/117962">http://wheatpedigree.net/sort/show/117962</a>   |
| 96  | KWS Zyatt         | <i>T. aest.</i> | winter | UK      |             |                                                                                                     |
| 97  | L.2168k4-3        | <i>T. aest.</i> | winter | Russia  | Krasnodar   |                                                                                                     |
| 98  | L.2293k           | <i>T. aest.</i> | winter | Russia  | Krasnodar   |                                                                                                     |
| 99  | L.2612k2-1        | <i>T. aest.</i> | winter | Russia  | Krasnodar   |                                                                                                     |
| 100 | L.2877k58         | <i>T. aest.</i> | winter | Russia  | Krasnodar   |                                                                                                     |
| 101 | L.3124k4          | <i>T. aest.</i> | winter | Russia  | Krasnodar   |                                                                                                     |
| 102 | L.3244k29-1       | <i>T. aest.</i> | winter | Russia  | Krasnodar   |                                                                                                     |
| 103 | L.3451k           | <i>T. aest.</i> | winter | Russia  | Krasnodar   |                                                                                                     |
| 104 | L.3947k2-4        | <i>T. aest.</i> | winter | Russia  | Krasnodar   |                                                                                                     |
| 105 | L.4648k12         | <i>T. aest.</i> | winter | Russia  | Krasnodar   |                                                                                                     |
| 106 | Laureat           | <i>T. aest.</i> | winter | Russia  | Krasnodar   | <a href="http://wheatpedigree.net/sort/show/97287">http://wheatpedigree.net/sort/show/97287</a>     |
| 107 | Lebed             | <i>T. aest.</i> | winter | Russia  | Krasnodar   | <a href="http://wheatpedigree.net/sort/show/85769">http://wheatpedigree.net/sort/show/85769</a>     |
| 108 | Lgovskaya 4       | <i>T. aest.</i> | winter | Russia  | Kursk       | <a href="http://wheatpedigree.net/sort/show/82501">http://wheatpedigree.net/sort/show/82501</a>     |
| 109 | Liga 1            | <i>T. aest.</i> | winter | Russia  | Krasnodar   | <a href="http://wheatpedigree.net/sort/show/85770">http://wheatpedigree.net/sort/show/85770</a>     |
| 110 | LITERA            | <i>T. aest.</i> | winter | Romania |             | <a href="http://wheatpedigree.net/sort/show/112008">http://wheatpedigree.net/sort/show/112008</a>   |

|     |                   |                 |        |                |                  |                                                                                                     |
|-----|-------------------|-----------------|--------|----------------|------------------|-----------------------------------------------------------------------------------------------------|
| 111 | Lut.1234          | <i>T. aest.</i> | winter | Russia         | Krasnodar        |                                                                                                     |
| 112 | Lut.3164h16-23-14 | <i>T. aest.</i> | winter | Russia         | Krasnodar        |                                                                                                     |
| 113 | Lut.4498h138G7    | <i>T. aest.</i> | winter | Russia         | Krasnodar        |                                                                                                     |
| 114 | LYRIK             | <i>T. aest.</i> | winter | France         |                  |                                                                                                     |
| 115 | Markiz            | <i>T. aest.</i> | winter | Russia         | Krasnodar        |                                                                                                     |
| 116 | Menestrel         | <i>T. aest.</i> | winter | France         |                  | <a href="http://wheatpedigree.net/sort/show/110769">http://wheatpedigree.net/sort/show/110769</a>   |
| 117 | MIRELA            | <i>T. aest.</i> | winter | Czech Republic | Bohemia          | <a href="http://wheatpedigree.net/sort/show/41719">http://wheatpedigree.net/sort/show/41719</a>     |
| 118 | Mironovskaya 808  | <i>T. aest.</i> | winter | Ukraine        | Kiev             | <a href="http://wheatpedigree.net/sort/show/41756">http://wheatpedigree.net/sort/show/41756</a>     |
| 119 | Mone              | <i>T. aest.</i> | winter | France         |                  | <a href="http://wheatpedigree.net/sort/show/42149">http://wheatpedigree.net/sort/show/42149</a>     |
| 120 | Morozko           | <i>T. aest.</i> | winter | Russia         | Krasnodar        | <a href="http://wheatpedigree.net/sort/show/117030">http://wheatpedigree.net/sort/show/117030</a>   |
| 121 | Moskovskaya 40    | <i>T. aest.</i> | winter | Russia         | Moscow           | <a href="http://wheatpedigree.net/sort/show/88928">http://wheatpedigree.net/sort/show/88928</a>     |
| 122 | Moskovskaya 82    | <i>T. aest.</i> | winter | Russia         | Moscow           | <a href="https://reestr.gossortrf.ru/sorts/8262641/">https://reestr.gossortrf.ru/sorts/8262641/</a> |
| 123 | Moskvich          | <i>T. aest.</i> | winter | Russia         | Krasnodar        | <a href="http://wheatpedigree.net/sort/show/82539">http://wheatpedigree.net/sort/show/82539</a>     |
| 124 | Musik             | <i>T. aest.</i> | winter | France         |                  |                                                                                                     |
| 125 | Mv Nador          | <i>T. aest.</i> | winter | Hungary        |                  | <a href="http://wheatpedigree.net/sort/show/116412">http://wheatpedigree.net/sort/show/116412</a>   |
| 126 | Mv Nemere         | <i>T. aest.</i> | winter | Hungary        |                  | <a href="http://wheatpedigree.net/sort/show/119141">http://wheatpedigree.net/sort/show/119141</a>   |
| 127 | Mv Vekni          | <i>T. aest.</i> | winter | Hungary        |                  | <a href="http://wheatpedigree.net/sort/show/88148">http://wheatpedigree.net/sort/show/88148</a>     |
| 128 | Nakhodka          | <i>T. aest.</i> | winter | Russia         | Rostov           | <a href="http://wheatpedigree.net/sort/show/117031">http://wheatpedigree.net/sort/show/117031</a>   |
| 129 | NEKOTA            | <i>T. aest.</i> | winter | USA            | South-Dakota     | <a href="http://wheatpedigree.net/sort/show/71003">http://wheatpedigree.net/sort/show/71003</a>     |
| 130 | Nemchinovskaya 17 | <i>T. aest.</i> | winter | Russia         | Moscow           | <a href="http://wheatpedigree.net/sort/show/113660">http://wheatpedigree.net/sort/show/113660</a>   |
| 131 | Nemchinovskaya 24 | <i>T. aest.</i> | winter | Russia         | Moscow           | <a href="http://wheatpedigree.net/sort/show/81229">http://wheatpedigree.net/sort/show/81229</a>     |
| 132 | Nemchinovskaya 57 | <i>T. aest.</i> | winter | Russia         | Moscow           | <a href="http://wheatpedigree.net/sort/show/85744">http://wheatpedigree.net/sort/show/85744</a>     |
| 133 | Nemchinovskaya 85 | <i>T. aest.</i> | winter | Russia         | Moscow           | <a href="https://reestr.gossortrf.ru/sorts/8262640/">https://reestr.gossortrf.ru/sorts/8262640/</a> |
| 134 | NIC 11 11637 D    | <i>T. aest.</i> | winter | France         | Clermont-Ferrand | <a href="https://reestr.gossortrf.ru/sorts/8559179/">https://reestr.gossortrf.ru/sorts/8559179/</a> |
| 135 | Nikifor           | <i>T. aest.</i> | winter | Romania        |                  | <a href="http://wheatpedigree.net/sort/show/115661">http://wheatpedigree.net/sort/show/115661</a>   |
| 136 | Nota              | <i>T. aest.</i> | winter | Russia         | Krasnodar        | <a href="http://wheatpedigree.net/sort/show/82572">http://wheatpedigree.net/sort/show/82572</a>     |
| 137 | Novosibirskaya 32 | <i>T. aest.</i> | winter | Russia         | Novosibirsk      | <a href="http://wheatpedigree.net/sort/show/82398">http://wheatpedigree.net/sort/show/82398</a>     |

|     |               |                   |        |            |              |                                                                                                     |
|-----|---------------|-------------------|--------|------------|--------------|-----------------------------------------------------------------------------------------------------|
| 138 | NYCKOR        | <i>T. aest.</i>   | winter |            |              |                                                                                                     |
| 139 | Odesskaya 200 | <i>T. aest.</i>   | winter | Ukraine    | Odessa       | <a href="http://wheatpedigree.net/sort/show/82520">http://wheatpedigree.net/sort/show/82520</a>     |
| 140 | Olkhon        | <i>T. aest.</i>   | winter | Russia     | Krasnodar    | <a href="http://wheatpedigree.net/sort/show/96206">http://wheatpedigree.net/sort/show/96206</a>     |
| 141 | Ordynka       | <i>T. sphaer.</i> | winter | Russia     | Krasnodar    | <a href="https://reestr.gossortrf.ru/sorts/8260617/">https://reestr.gossortrf.ru/sorts/8260617/</a> |
| 142 | Pamyat        | <i>T. aest.</i>   | winter | Russia     | Krasnodar    | <a href="http://wheatpedigree.net/sort/show/78221">http://wheatpedigree.net/sort/show/78221</a>     |
| 143 | Paritet       | <i>T. aest.</i>   | winter | Russia     | Stavropol    | <a href="https://reestr.gossortrf.ru/sorts/8356460/">https://reestr.gossortrf.ru/sorts/8356460/</a> |
| 144 | Platin        | <i>T. aest.</i>   | winter | Poland     |              |                                                                                                     |
| 145 | Praskovya     | <i>T. sphaer.</i> | winter | Russia     | Krasnodar    | <a href="http://wheatpedigree.net/sort/show/113672">http://wheatpedigree.net/sort/show/113672</a>   |
| 146 | Proton        | <i>T. aest.</i>   | winter | Russia     | Krasnodar    | <a href="http://wheatpedigree.net/sort/show/88961">http://wheatpedigree.net/sort/show/88961</a>     |
| 147 | Proza         | <i>T. aest.</i>   | winter | Russia     | Vladimir     | <a href="http://wheatpedigree.net/sort/show/110921">http://wheatpedigree.net/sort/show/110921</a>   |
| 148 | Rossyp        | <i>T. aest.</i>   | winter | Russia     | Krasnodar    | <a href="https://reestr.gossortrf.ru/sorts/8262669/">https://reestr.gossortrf.ru/sorts/8262669/</a> |
| 149 | Schit         | <i>T. aest.</i>   | winter | Russia     | Stavropol    | <a href="https://reestr.gossortrf.ru/sorts/8152760/">https://reestr.gossortrf.ru/sorts/8152760/</a> |
| 150 | Sila          | <i>T. aest.</i>   | winter | Russia     | Krasnodar    | <a href="http://wheatpedigree.net/sort/show/85820">http://wheatpedigree.net/sort/show/85820</a>     |
| 151 | Simonida      | <i>T. aest.</i>   | winter | Yugoslavia | Serbia       | <a href="http://wheatpedigree.net/sort/show/90607">http://wheatpedigree.net/sort/show/90607</a>     |
| 152 | Sineva        | <i>T. aest.</i>   | winter | Russia     | Orel         | <a href="https://reestr.gossortrf.ru/sorts/8354631/">https://reestr.gossortrf.ru/sorts/8354631/</a> |
| 153 | Smuglyanka    | <i>T. aest.</i>   | winter | Russia     | Saratov      | <a href="http://wheatpedigree.net/sort/show/69615">http://wheatpedigree.net/sort/show/69615</a>     |
| 154 | Snigurka      | <i>T. aest.</i>   | winter | Ukraine    | Kiev         | <a href="http://wheatpedigree.net/sort/show/112229">http://wheatpedigree.net/sort/show/112229</a>   |
| 155 | Sodruzhestvo  | <i>T. aest.</i>   | winter | Russia     | Barnaul      | <a href="https://reestr.gossortrf.ru/sorts/8262621/">https://reestr.gossortrf.ru/sorts/8262621/</a> |
| 156 | Solovey       | <i>T. aest.</i>   | winter | Russia     | Kursk        | <a href="https://reestr.gossortrf.ru/sorts/8559231/">https://reestr.gossortrf.ru/sorts/8559231/</a> |
| 157 | Stan          | <i>T. aest.</i>   | winter | Russia     | Krasnodar    | <a href="http://wheatpedigree.net/sort/show/117035">http://wheatpedigree.net/sort/show/117035</a>   |
| 158 | Stanichnaya   | <i>T. aest.</i>   | winter | Russia     | Rostov       | <a href="http://wheatpedigree.net/sort/show/78214">http://wheatpedigree.net/sort/show/78214</a>     |
| 159 | Step          | <i>T. aest.</i>   | winter | Russia     | Krasnodar    | <a href="https://reestr.gossortrf.ru/sorts/8559199/">https://reestr.gossortrf.ru/sorts/8559199/</a> |
| 160 | Svarog        | <i>T. aest.</i>   | winter | Russia     | Krasnodar    | <a href="https://reestr.gossortrf.ru/sorts/8556853/">https://reestr.gossortrf.ru/sorts/8556853/</a> |
| 161 | Tabor         | <i>T. aest.</i>   | winter | Russia     | Krasnodar    | <a href="http://wheatpedigree.net/sort/show/113662">http://wheatpedigree.net/sort/show/113662</a>   |
| 162 | Tanais        | <i>T. aest.</i>   | winter | Russia     | Rostov       | <a href="http://wheatpedigree.net/sort/show/82542">http://wheatpedigree.net/sort/show/82542</a>     |
| 163 | Tandem        | <i>T. aest.</i>   | winter | USA        | South-Dakota | <a href="http://wheatpedigree.net/sort/show/69745">http://wheatpedigree.net/sort/show/69745</a>     |
| 164 | Tanya         | <i>T. aest.</i>   | winter | Russia     | Krasnodar    | <a href="http://wheatpedigree.net/sort/show/82499">http://wheatpedigree.net/sort/show/82499</a>     |
| 165 | Tayfun 7      | <i>T. aest.</i>   | winter | Russia     | Stavropol    | <a href="https://reestr.gossortrf.ru/sorts/8152839/">https://reestr.gossortrf.ru/sorts/8152839/</a> |



|     |                  |                 |              |         |           |                                                                                                     |
|-----|------------------|-----------------|--------------|---------|-----------|-----------------------------------------------------------------------------------------------------|
| 166 | Travitsa         | <i>T. aest.</i> | winter       | Russia  | Belgorod  | <a href="https://reestr.gossortrf.ru/sorts/8152850/">https://reestr.gossortrf.ru/sorts/8152850/</a> |
| 167 | Trio             | <i>T. aest.</i> | winter       | Russia  | Krasnodar | <a href="http://wheatpedigree.net/sort/show/113664">http://wheatpedigree.net/sort/show/113664</a>   |
| 168 | Turanus          | <i>T. aest.</i> | winter       | Austria |           | <a href="https://reestr.gossortrf.ru/sorts/8456252/">https://reestr.gossortrf.ru/sorts/8456252/</a> |
| 169 | Turnia           | <i>T. aest.</i> | winter       | Poland  |           | <a href="http://wheatpedigree.net/sort/show/74657">http://wheatpedigree.net/sort/show/74657</a>     |
| 170 | Tvorets          | <i>T. aest.</i> | winter       | Russia  | Krasnodar | <a href="http://wheatpedigree.net/sort/show/88964">http://wheatpedigree.net/sort/show/88964</a>     |
| 171 | Ultra 11         | <i>T. aest.</i> | winter       | Russia  | Krasnodar |                                                                                                     |
| 172 | Ulyasha          | <i>T. aest.</i> | winter       | Russia  | Stavropol | <a href="https://reestr.gossortrf.ru/sorts/8354709/">https://reestr.gossortrf.ru/sorts/8354709/</a> |
| 173 | Urup             | <i>T. aest.</i> | winter       | Russia  | Krasnodar | <a href="http://wheatpedigree.net/sort/show/116997">http://wheatpedigree.net/sort/show/116997</a>   |
| 174 | Utrish           | <i>T. aest.</i> | winter       | Russia  | Krasnodar | <a href="http://wheatpedigree.net/sort/show/88965">http://wheatpedigree.net/sort/show/88965</a>     |
| 175 | Vassa            | <i>T. aest.</i> | winter       | Russia  | Krasnodar | <a href="http://wheatpedigree.net/sort/show/88955">http://wheatpedigree.net/sort/show/88955</a>     |
| 176 | Vekha            | <i>T. aest.</i> | winter       | Russia  | Krasnodar | <a href="https://reestr.gossortrf.ru/sorts/8556855/">https://reestr.gossortrf.ru/sorts/8556855/</a> |
| 177 | Velena           | <i>T. aest.</i> | intermediate | Russia  | Krasnodar | <a href="https://reestr.gossortrf.ru/sorts/8654904/">https://reestr.gossortrf.ru/sorts/8654904/</a> |
| 178 | Vershina         | <i>T. aest.</i> | winter       | Russia  | Krasnodar | <a href="http://wheatpedigree.net/sort/show/88956">http://wheatpedigree.net/sort/show/88956</a>     |
| 179 | Vid              | <i>T. aest.</i> | winter       | Russia  | Krasnodar | <a href="https://reestr.gossortrf.ru/sorts/8556856/">https://reestr.gossortrf.ru/sorts/8556856/</a> |
| 180 | Videya           | <i>T. aest.</i> | winter       | Russia  | Krasnodar | <a href="https://reestr.gossortrf.ru/sorts/8458123/">https://reestr.gossortrf.ru/sorts/8458123/</a> |
| 181 | Vita             | <i>T. aest.</i> | winter       | Russia  | Krasnodar | <a href="http://wheatpedigree.net/sort/show/79046">http://wheatpedigree.net/sort/show/79046</a>     |
| 182 | Viuga            | <i>T. aest.</i> | winter       | Russia  | Samara    | <a href="https://reestr.gossortrf.ru/sorts/8356347/">https://reestr.gossortrf.ru/sorts/8356347/</a> |
| 183 | Viza             | <i>T. aest.</i> | winter       | Russia  | Krasnodar | <a href="http://wheatpedigree.net/sort/show/82559">http://wheatpedigree.net/sort/show/82559</a>     |
| 184 | Volnyi Don       | <i>T. aest.</i> | winter       | Russia  | Rostov    | <a href="https://reestr.gossortrf.ru/sorts/8260593/">https://reestr.gossortrf.ru/sorts/8260593/</a> |
| 185 | Volzhskaya Elena | <i>T. aest.</i> | winter       | Russia  | Ulyanovsk |                                                                                                     |
| 186 | Volzhskaya K     | <i>T. aest.</i> | winter       | Russia  | Ulyanovsk | <a href="http://wheatpedigree.net/sort/show/82405">http://wheatpedigree.net/sort/show/82405</a>     |
| 187 | Xiao Yan 107     | <i>T. aest.</i> | winter       | China   |           | <a href="http://wheatpedigree.net/sort/show/68164">http://wheatpedigree.net/sort/show/68164</a>     |
| 188 | Yubileinaya 100  | <i>T. aest.</i> | winter       | Russia  | Krasnodar | <a href="http://wheatpedigree.net/sort/show/80056">http://wheatpedigree.net/sort/show/80056</a>     |
| 189 | Yubiley Dona     | <i>T. aest.</i> | winter       | Russia  | Rostov    | <a href="https://reestr.gossortrf.ru/sorts/8262620/">https://reestr.gossortrf.ru/sorts/8262620/</a> |
| 190 | Yuka             | <i>T. aest.</i> | winter       | Russia  | Krasnodar | <a href="http://wheatpedigree.net/sort/show/96322">http://wheatpedigree.net/sort/show/96322</a>     |
| 191 | Yumpa            | <i>T. aest.</i> | winter       | Russia  | Krasnodar | <a href="http://wheatpedigree.net/sort/show/85824">http://wheatpedigree.net/sort/show/85824</a>     |
| 192 | Yunona           | <i>T. aest.</i> | winter       | Russia  | Krasnodar | <a href="http://wheatpedigree.net/sort/show/83090">http://wheatpedigree.net/sort/show/83090</a>     |
| 193 | Zhavoronok       | <i>T. aest.</i> | winter       | Russia  | Rostov    | <a href="https://reestr.gossortrf.ru/sorts/8260592/">https://reestr.gossortrf.ru/sorts/8260592/</a> |

|     |                |                 |        |         |           |                                                                                                     |
|-----|----------------|-----------------|--------|---------|-----------|-----------------------------------------------------------------------------------------------------|
| 194 | Zhiva          | <i>T. aest.</i> | winter | Russia  | Krasnodar | <a href="https://reestr.gossortrf.ru/sorts/8556854/">https://reestr.gossortrf.ru/sorts/8556854/</a> |
| 195 | Zhong Pin 1629 | <i>T. aest.</i> | winter | China   |           |                                                                                                     |
| 196 | Zimnitsa       | <i>T. aest.</i> | winter | Russia  | Krasnodar | <a href="http://wheatpedigree.net/sort/show/85767">http://wheatpedigree.net/sort/show/85767</a>     |
| 197 | Zimtra         | <i>T. aest.</i> | winter | Russia  | Krasnodar | <a href="http://wheatpedigree.net/sort/show/83126">http://wheatpedigree.net/sort/show/83126</a>     |
| 198 | Zina           | <i>T. aest.</i> | winter | Russia  | Stavropol | <a href="https://reestr.gossortrf.ru/sorts/8655024/">https://reestr.gossortrf.ru/sorts/8655024/</a> |
| 199 | Zolotokolosa   | <i>T. aest.</i> | winter | Ukraine | Kiev      | <a href="http://wheatpedigree.net/sort/show/88121">http://wheatpedigree.net/sort/show/88121</a>     |

<sup>1</sup> – *T. aest.* = *Triticum aestivum* L. subsp. *aestivum*; *T. sphaer.* = *Triticum aestivum* L. subsp. *sphaerococcum* (Percival) Mac Key
