# Supplementary material for: Alleles of the GRF3-2A Gene in Wheat and Their Agronomic Value
Source: MDPI journal article supplement (doi:10.3390/ijms222212376), 2021-11-16
Supplement: s1 [file s1]

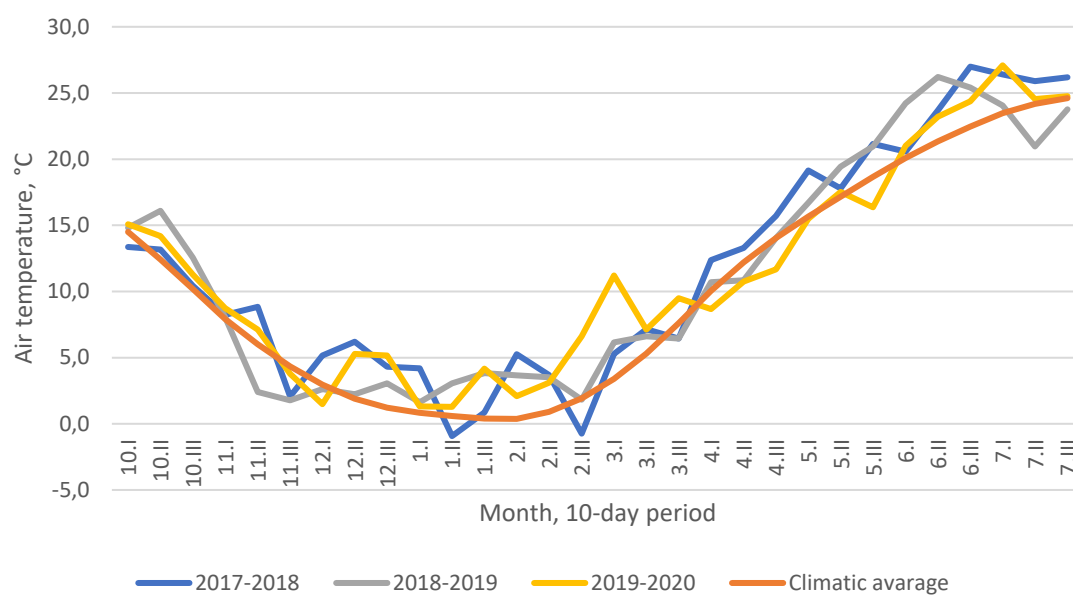

**Figure S5.** Mean temperature for 10-day periods from sowing (17-21 October) to harvesting of winter wheat at Krasnodar.

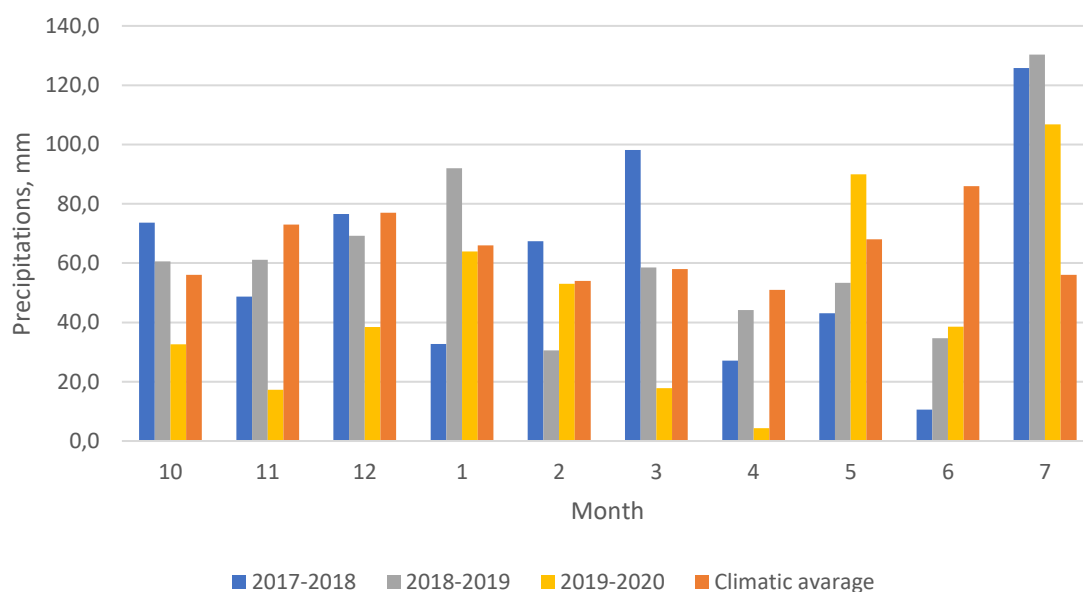

**Figure S6.** Monthly sums of precipitations from sowing (17-21 October) till harvesting of winter wheat at Krasnodar.
