# Supplementary material for: Alleles of the GRF3-2A Gene in Wheat and Their Agronomic Value
Source: MDPI journal article supplement (doi:10.3390/ijms222212376), 2021-11-16
Supplement: s1 [file s1]

**Table S1.** Bread wheat (*Triticum aestivum* L.) cultivars and breeding lines in which *TaGRF3-2A* gene was PCR-amplified and sequenced

| Accession name    | Growth habit | Country of origin | Locality    | Reference                                                                                                               |
|-------------------|--------------|-------------------|-------------|-------------------------------------------------------------------------------------------------------------------------|
| Alekseich         | winter       | Russia            | Krasnodar   | <a href="https://reestr.gossortrf.ru/sorts/8556858/">https://reestr.gossortrf.ru/sorts/8556858/</a>                     |
| Al-Murug          | spring       | Iraq              |             | <a href="https://doi.org/10.22363/2312-797X-2019-14-3-196-208">https://doi.org/10.22363/2312-797X-2019-14-3-196-208</a> |
| Altigo            | winter       | France            |             | <a href="http://wheatpedigree.net/sort/show/110689">http://wheatpedigree.net/sort/show/110689</a>                       |
| Doka              | winter       | Russia            | Krasnodar   | <a href="http://wheatpedigree.net/sort/show/81808">http://wheatpedigree.net/sort/show/81808</a>                         |
| Fisht             | winter       | Russia            | Krasnodar   | <a href="http://wheatpedigree.net/sort/show/76190">http://wheatpedigree.net/sort/show/76190</a>                         |
| Grom              | winter       | Russia            | Krasnodar   | <a href="http://wheatpedigree.net/sort/show/85804">http://wheatpedigree.net/sort/show/85804</a>                         |
| Iraq              | spring       | Iraq              |             | <a href="https://doi.org/10.22363/2312-797X-2019-14-3-196-208">https://doi.org/10.22363/2312-797X-2019-14-3-196-208</a> |
| L.2877k58         | winter       | Russia            | Krasnodar   |                                                                                                                         |
| Novosibirskaya 67 | spring       | Russia            | Novosibirsk | <a href="http://wheatpedigree.net/sort/show/45416">http://wheatpedigree.net/sort/show/45416</a>                         |
| Proton            | winter       | Russia            | Krasnodar   | <a href="http://wheatpedigree.net/sort/show/88961">http://wheatpedigree.net/sort/show/88961</a>                         |
| Romi              | spring       | Spain             |             | <a href="http://wheatpedigree.net/sort/show/52824">http://wheatpedigree.net/sort/show/52824</a>                         |
| Saratovskaya 29   | spring       | Russia            | Saratov     | <a href="http://wheatpedigree.net/sort/show/56274">http://wheatpedigree.net/sort/show/56274</a>                         |
| Sila              | winter       | Russia            | Krasnodar   | <a href="http://wheatpedigree.net/sort/show/85820">http://wheatpedigree.net/sort/show/85820</a>                         |
| Stan              | winter       | Russia            | Krasnodar   | <a href="http://wheatpedigree.net/sort/show/117035">http://wheatpedigree.net/sort/show/117035</a>                       |
| Starshina         | winter       | Russia            | Krasnodar   | <a href="http://wheatpedigree.net/sort/show/79122">http://wheatpedigree.net/sort/show/79122</a>                         |
| Tamuz 3           | spring       | Iraq              |             | <a href="http://wheatpedigree.net/sort/show/71100">http://wheatpedigree.net/sort/show/71100</a>                         |
| Vassa             | winter       | Russia            | Krasnodar   | <a href="http://wheatpedigree.net/sort/show/88955">http://wheatpedigree.net/sort/show/88955</a>                         |
| Velena            | intermediate | Russia            | Krasnodar   | <a href="https://reestr.gossortrf.ru/sorts/8654904/">https://reestr.gossortrf.ru/sorts/8654904/</a>                     |
| Vid               | winter       | Russia            | Krasnodar   | <a href="https://reestr.gossortrf.ru/sorts/8556856/">https://reestr.gossortrf.ru/sorts/8556856/</a>                     |
